# Supplementary material for: Assessing Climate Change Impacts on Live Fuel Moisture and Wildfire Risk Using a Hydrodynamic Vegetation Model
Source: Copernicus journal article supplement (doi:10.5194/bg-2020-430), 2020-11-25
Supplement: Supplementary file [file bg-2020-430-AC1-supplement.zip]

Table S1. Soil texture information for 10 layers at Stunt Ranch based on the soil survey database (<https://websoilsurvey.sc.egov.usda.gov/App/WebSoilSurvey.aspx>).

| Soil depth (m) | Percent Clay (%) | Percent Sand (%) | Percent Organic (%) | Bulk density (g/cm <sup>3</sup> ) | Organic density (kg/m <sup>3</sup> ) |
|----------------|------------------|------------------|---------------------|-----------------------------------|--------------------------------------|
| 0.007101       | 22.5             | 39.8             | 3.5                 | 1.15                              | 80.5                                 |
| 0.027925       | 22.5             | 39.8             | 3.5                 | 1.15                              | 80.5                                 |
| 0.062259       | 22.5             | 39.8             | 3.5                 | 1.15                              | 80.5                                 |
| 0.118865       | 25.3             | 38.3             | 2.42                | 1.15                              | 55.66                                |
| 0.212193       | 31               | 35.4             | 0.25                | 1.15                              | 5.75                                 |
| 0.366066       | 30.7             | 41.7             | 0.25                | 1.13                              | 5.65                                 |
| 0.619758       | 30               | 55.5             | 0.25                | 1.1                               | 5.5                                  |
| 1.038027       | 30               | 55.5             | 0.25                | 1.1                               | 5.5                                  |
| 1.727635       | 30               | 55.5             | 0.25                | 1.1                               | 5.5                                  |
| 2.864607       | 30               | 55.5             | 0.25                | 1.1                               | 5.5                                  |

Table S2. Allometry, leaf and wood traits, and hydraulic traits of 11 chaparral shrub species in Stunt Ranch.

| Traits\species                                                                                | Af     | Cc     | As     | Ag     | Cs     | MI     | Ro     | Ri     | Cb     | Ha     | Qb     |
|-----------------------------------------------------------------------------------------------|--------|--------|--------|--------|--------|--------|--------|--------|--------|--------|--------|
| Fates_allom_d2h1                                                                              | 1.24   | 1.24   | 1.24   | 1.24   | 1.24   | 1.24   | 1.24   | 1.24   | 1.24   | 1.24   | 1.24   |
| Fates_allom_d2h2                                                                              | 0.39   | 0.39   | 0.39   | 0.39   | 0.39   | 0.39   | 0.39   | 0.39   | 0.39   | 0.39   | 0.39   |
| Fates_allom_dbh_maxheight                                                                     | 2.26   | 3.41   | 4.15   | 2.07   | 4.25   | 3.23   | 3.25   | 3.02   | 4.15   | 4.15   | 3.23   |
| Fates_allom_agb1                                                                              | 0.1162 | 0.1162 | 0.1162 | 0.1162 | 0.1162 | 0.1162 | 0.1162 | 0.1162 | 0.1162 | 0.1162 | 0.1162 |
| Fates_allom_agb2                                                                              | 0.000  | 0.000  | 0.000  | 0.000  | 0.000  | 0.000  | 0.000  | 0.000  | 0.000  | 0.000  | 0.000  |
| Fates_allom_agb3                                                                              | 2.126  | 2.126  | 2.126  | 2.126  | 2.126  | 2.126  | 2.126  | 2.126  | 2.126  | 2.126  | 2.126  |
| Fates_allom_agb4                                                                              | 0.931  | 0.931  | 0.931  | 0.931  | 0.931  | 0.931  | 0.931  | 0.931  | 0.931  | 0.931  | 0.931  |
| Fates_allom_d2bl1                                                                             | 0.2463 | 0.2463 | 0.2463 | 0.2463 | 0.2463 | 0.2463 | 0.2463 | 0.2463 | 0.2463 | 0.2463 | 0.2463 |
| Fates_allom_d2bl2                                                                             | 1.022  | 1.022  | 1.022  | 1.022  | 1.022  | 1.022  | 1.022  | 1.022  | 1.022  | 1.022  | 1.022  |
| Fates_allom_d2ca_max                                                                          | 3.93   | 3.16   | 11.42  | 0.54   | 1.81   | 2.52   | 9.70   | 5.29   | 11.42  | 11.42  | 2.52   |
| Specific leaf area (m <sup>2</sup> ·gC <sup>-1</sup> )                                        | 0.0059 | 0.0043 | 0.0114 | 0.0052 | 0.0069 | 0.0052 | 0.0044 | 0.0085 | 0.0100 | 0.0041 | 0.0074 |
| Max carboxylation rate at 25°C (μmol·m <sup>-2</sup> ·s <sup>-1</sup> )                       | 41     | 57     | 41     | 37     | 57     | 51     | 51     | 57     | 64     | 33     | 52     |
| Wood density (g·cm <sup>-3</sup> )                                                            | 0.679  | 0.678  | 0.620  | 0.662  | 0.615  | 0.497  | 0.523  | 0.706  | 0.667  | 0.608  | 0.724  |
| Maximum xylem conductivity per area (kg·MPa <sup>-1</sup> ·m <sup>-1</sup> ·s <sup>-1</sup> ) | 0.642  | 0.553  | 1.550  | 1.267  | 1.517  | 5.710  | 1.640  | 0.606  | 2.032  | 2.264  | 3.375  |
| Xylem water potential at 50% loss of conductivity (MPa)                                       | -7.33  | -7.19  | -4.65  | -5.09  | -4.14  | -0.52  | -0.56  | -7.20  | -7.50  | -6.20  | -1.51  |
| Leaf water potential at 50% loss of stomatal conductivity (MPa)                               | -3.61  | -5.06  | -3.61  | -3.36  | -2.91  | -1.93  | -1.78  | -2.91  | -3.61  | -3.61  | -3.73  |
| Osmotic potential at turgor loss point (Mpa)                                                  | -3.397 | -3.658 | -2.326 | -2.514 | -2.797 | -2.071 | -1.563 | -3.126 | -2.023 | -2.702 | -1.968 |
| Osmotic potential at full turgor (Mpa)                                                        | -2.693 | -3.658 | -1.659 | -1.800 | -2.151 | -1.585 | -1.225 | -2.956 | -1.406 | -1.900 | -1.523 |

Note: Chamise (*Adenostoma fasciculatum* – Af, PFT=LP~~AH~~), red shank (*Adenostoma sparsifolium* – As, PFT=LP~~AH~~), big berry manzanita (*Arctostaphylos glauca* – Ag, PFT=LP~~AH~~), buck brush (*Ceanothus cuneatus* – Cc, PFT=HP~~AH~~), greenbark ceanothus (*Ceanothus spinosus* – Cs, PFT=HP~~AH~~), mountain mahogany (*Cercocarpus betuloides* – Cb, PFT=HP~~AH~~), toyon (*Heteromeles arbutifolia* – Ha, PFT=LP~~AH~~), laurel sumac (*Malosma laurina* – MI, PFT=MP~~CH~~), scrub oak (*Quercus berberidifolia* – Qb, PFT=MP~~CH~~), hollyleaf redberry (*Rhamnus ilicifolia* – Ri, PFT=HP~~AH~~), and sugar bush (*Rhus ovata* – Ro, PFT=MP~~CH~~).

Table S3. Allometry, leaf and wood traits, and hydraulic traits of three PFTs in Stunt Ranch.

| Traits\species                                                                                              | PFT_LPAH | PFT_MPCH | PFT_HPAH |
|-------------------------------------------------------------------------------------------------------------|----------|----------|----------|
| Fates_allom_d2h1                                                                                            | 1.24     | 1.24     | 1.24     |
| Fates_allom_d2h2                                                                                            | 0.39     | 0.39     | 0.39     |
| Fates_allom_dbh_maxheight                                                                                   | 3.18     | 3.24     | 3.73     |
| Fates_allom_agb1                                                                                            | 0.12     | 0.12     | 0.12     |
| Fates_allom_agb2                                                                                            | 0.00     | 0.00     | 0.00     |
| Fates_allom_agb3                                                                                            | 2.13     | 2.13     | 2.13     |
| Fates_allom_agb4                                                                                            | 0.93     | 0.93     | 0.93     |
| Fates_allom_d2b11                                                                                           | 0.25     | 0.25     | 0.25     |
| Fates_allom_d2b12                                                                                           | 1.02     | 1.02     | 1.02     |
| Fates_allom_d2ca_max                                                                                        | 4.96     | 9.15     | 11.42    |
| Specific leaf area ( $\text{m}^2\cdot\text{gC}^{-1}$ )                                                      | 0.007    | 0.005    | 0.007    |
| Max carboxylation rate at 25°C ( $\mu\text{mol}\cdot\text{m}^{-2}\cdot\text{s}^{-1}$ )                      | 38.00    | 51.33    | 58.75    |
| Wood density ( $\text{g}\cdot\text{cm}^{-3}$ )                                                              | 0.64     | 0.58     | 0.67     |
| Maximum xylem conductivity per area ( $\text{kg}\cdot\text{MPa}^{-1}\cdot\text{m}^{-1}\cdot\text{s}^{-1}$ ) | 1.43     | 3.58     | 1.18     |
| Xylem water potential at 50% loss of conductivity (MPa)                                                     | -5.82    | -0.86    | -6.51    |
| Leaf water potential at 50% loss of stomatal conductivity (MPa)                                             | -3.55    | -2.48    | -3.62    |
| Turgor loss point (Mpa)                                                                                     | -2.73    | -1.87    | -2.90    |
| Osmotic potential at full turgor (Mpa)                                                                      | -2.00    | -1.40    | -2.10    |

| Traits\species                                                                                                              | PFT-LA       | PFT-MC       | PFT-HA       |
|-----------------------------------------------------------------------------------------------------------------------------|--------------|--------------|--------------|
| <u>Fates_allom_d2h1</u>                                                                                                     | <u>1.24</u>  | <u>1.24</u>  | <u>1.24</u>  |
| <u>Fates_allom_d2h2</u>                                                                                                     | <u>0.39</u>  | <u>0.39</u>  | <u>0.39</u>  |
| <u>Fates_allom_dbh_maxheight</u>                                                                                            | <u>3.18</u>  | <u>3.24</u>  | <u>3.73</u>  |
| <u>Fates_allom_agb1</u>                                                                                                     | <u>0.12</u>  | <u>0.12</u>  | <u>0.12</u>  |
| <u>Fates_allom_agb2</u>                                                                                                     | <u>0.00</u>  | <u>0.00</u>  | <u>0.00</u>  |
| <u>Fates_allom_agb3</u>                                                                                                     | <u>2.13</u>  | <u>2.13</u>  | <u>2.13</u>  |
| <u>Fates_allom_agb4</u>                                                                                                     | <u>0.93</u>  | <u>0.93</u>  | <u>0.93</u>  |
| <u>Fates_allom_d2b11</u>                                                                                                    | <u>0.25</u>  | <u>0.25</u>  | <u>0.25</u>  |
| <u>Fates_allom_d2b12</u>                                                                                                    | <u>1.02</u>  | <u>1.02</u>  | <u>1.02</u>  |
| <u>Fates_allom_d2ca_max</u>                                                                                                 | <u>4.96</u>  | <u>9.15</u>  | <u>11.42</u> |
| <u>Specific leaf area (<math>\text{m}^2\cdot\text{gC}^{-1}</math>)</u>                                                      | <u>0.007</u> | <u>0.005</u> | <u>0.007</u> |
| <u>Max carboxylation rate at 25°C (<math>\mu\text{mol}\cdot\text{m}^{-2}\cdot\text{s}^{-1}</math>)</u>                      | <u>38.00</u> | <u>51.33</u> | <u>58.75</u> |
| <u>Wood density (<math>\text{g}\cdot\text{cm}^{-3}</math>)</u>                                                              | <u>0.64</u>  | <u>0.58</u>  | <u>0.67</u>  |
| <u>Maximum xylem conductivity per area (<math>\text{kg}\cdot\text{MPa}^{-1}\cdot\text{m}^{-1}\cdot\text{s}^{-1}</math>)</u> | <u>1.43</u>  | <u>3.58</u>  | <u>1.18</u>  |
| <u>Xylem water potential at 50% loss of conductivity (MPa)</u>                                                              | <u>-5.82</u> | <u>-0.86</u> | <u>-6.51</u> |

|                                                                                |              |              |              |
|--------------------------------------------------------------------------------|--------------|--------------|--------------|
| <u>Leaf water potential at 50%<br/>loss of stomatal conductivity<br/>(MPa)</u> | <u>-3.55</u> | <u>-2.48</u> | <u>-3.62</u> |
| <u>Osmotic potential<br/>at turgor loss point (Mpa)</u>                        | <u>-2.73</u> | <u>-1.87</u> | <u>-2.90</u> |
| <u>Osmotic potential<br/>at full turgor (Mpa)</u>                              | <u>-2.00</u> | <u>-1.40</u> | <u>-2.10</u> |

Table S4. Number of days per year of live fuel moisture content below 79% of three PFTs under RCP 4.5 and 8.5 from the historical period ~~1950~~1960-1999 to the future period ~~2075~~2080-2099.

| Periods    | 79%                                 |                                     |                                     |                                     |                                     |                                     |
|------------|-------------------------------------|-------------------------------------|-------------------------------------|-------------------------------------|-------------------------------------|-------------------------------------|
|            | RCP4.5                              |                                     |                                     | RCP8.5                              |                                     |                                     |
|            | <del>PFT-</del><br><del>-LPAH</del> | <del>PFT-</del><br><del>-MPCH</del> | <del>PFT-</del><br><del>-HPAH</del> | <del>PFT-</del><br><del>-LPAH</del> | <del>PFT-</del><br><del>-MPCH</del> | <del>PFT-</del><br><del>-HPAH</del> |
| Historical | 135                                 | 101                                 | 156                                 | 135                                 | 101                                 | 156                                 |
| Future     | 145                                 | 113                                 | 165                                 | 156                                 | 124                                 | 176                                 |

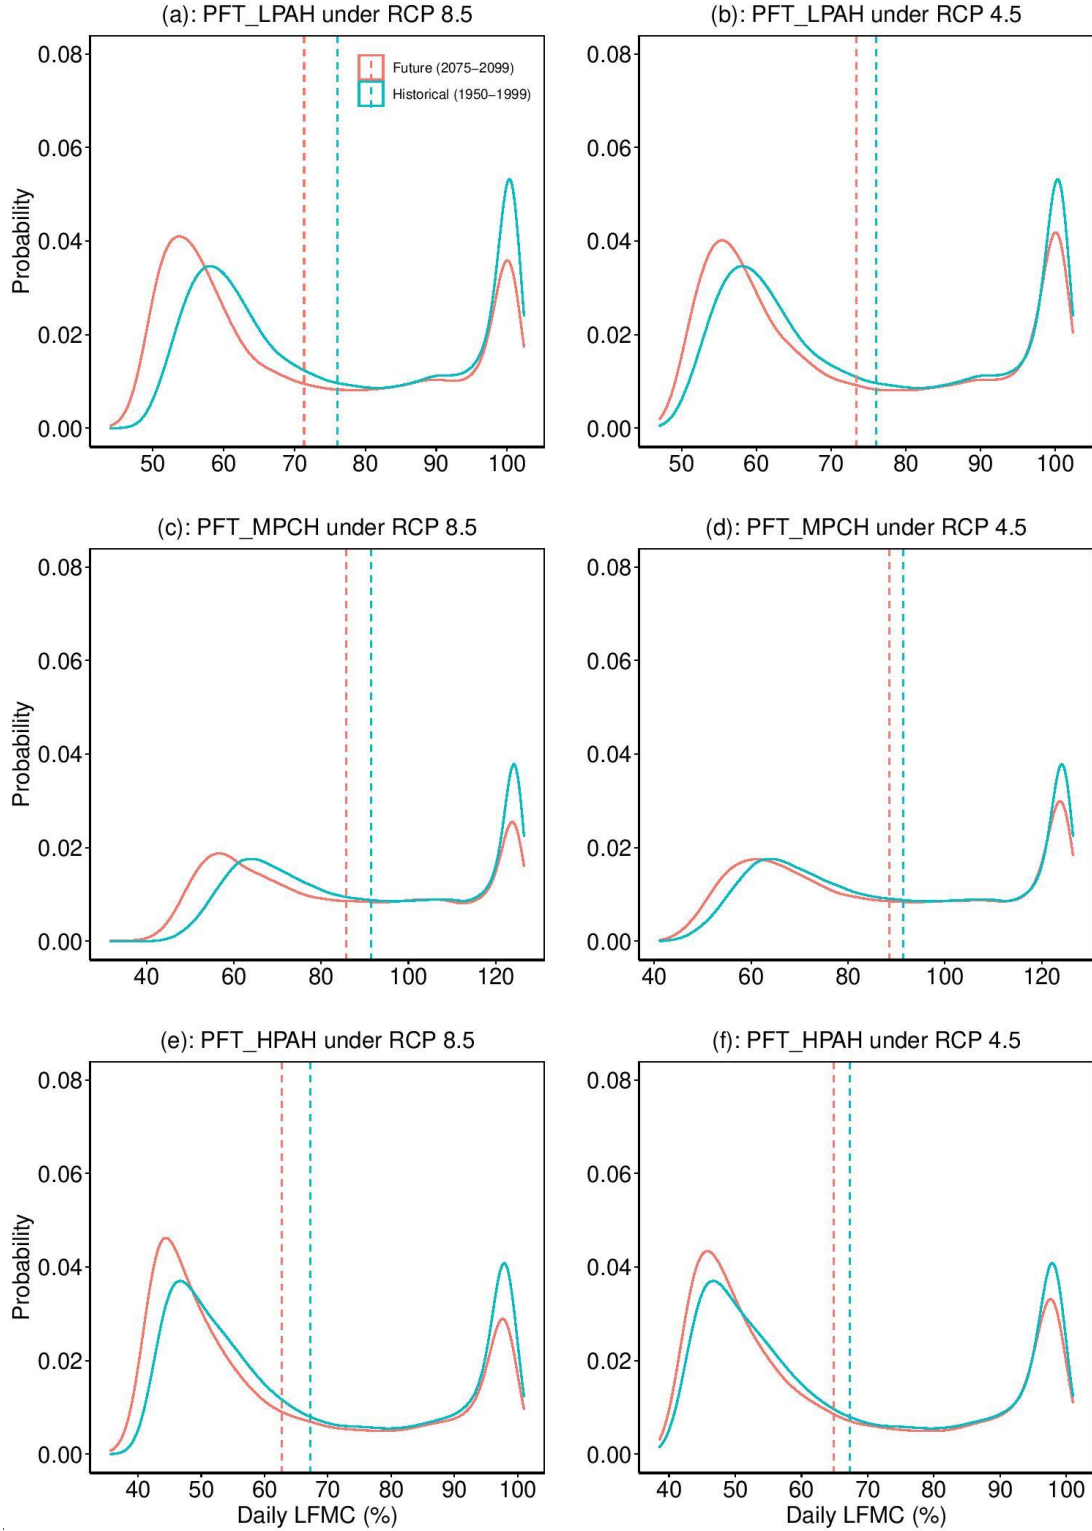

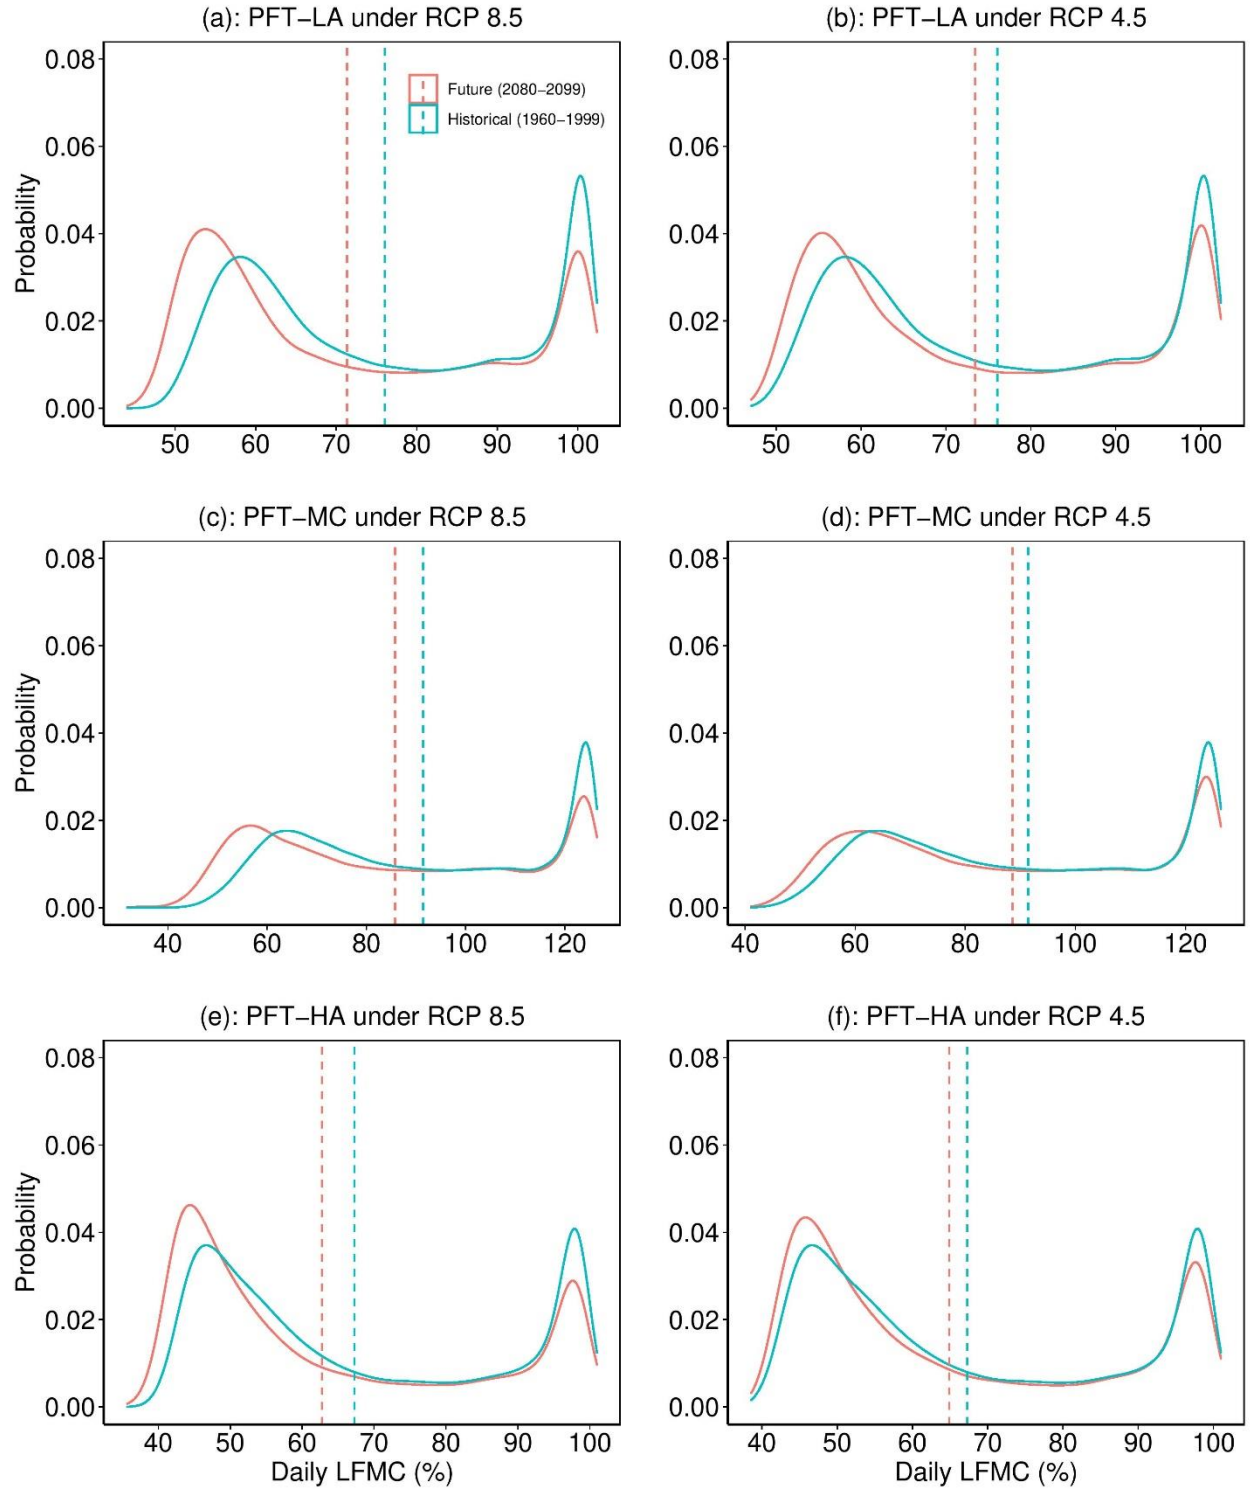

**Fig.S1** Comparisons on histogram of daily mean live fuel moisture content considering all climatic variables changes during dry season between future period (20752080-2099) and historical period (19501960-1999) for three PFTs (refer to Figure 1 for explanation of the PFTs) under climate scenario RCP 4.5 and 8.5.

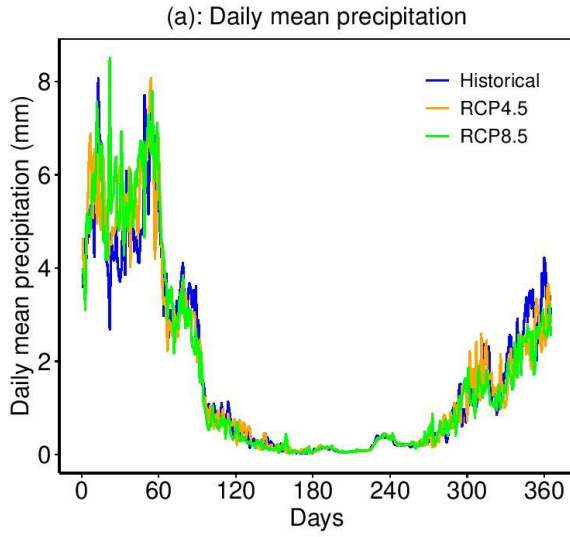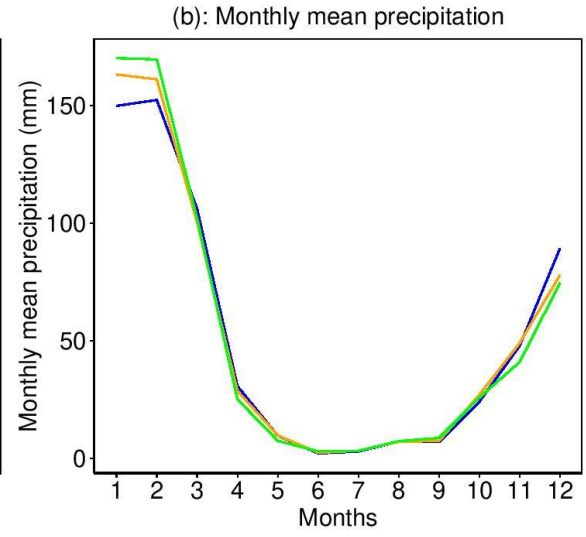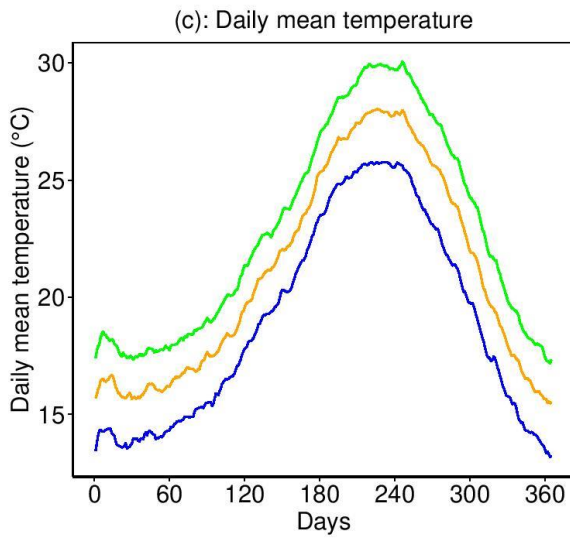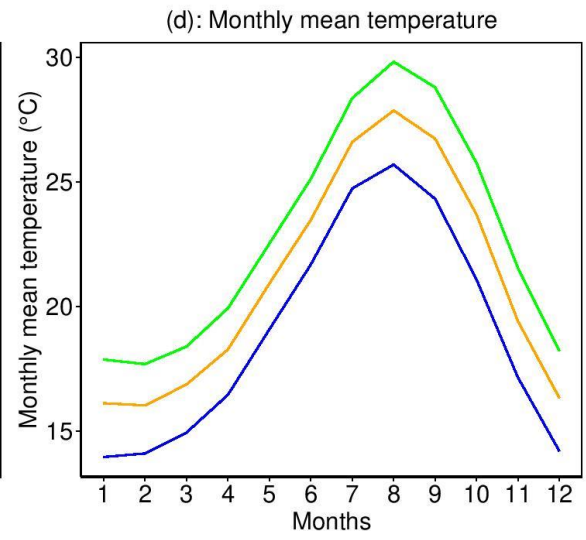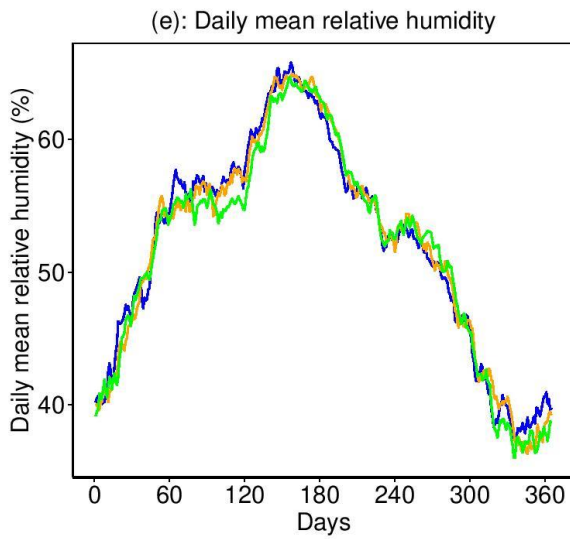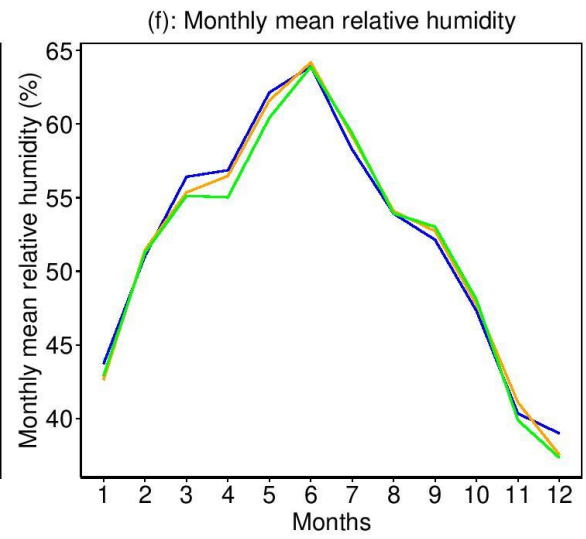

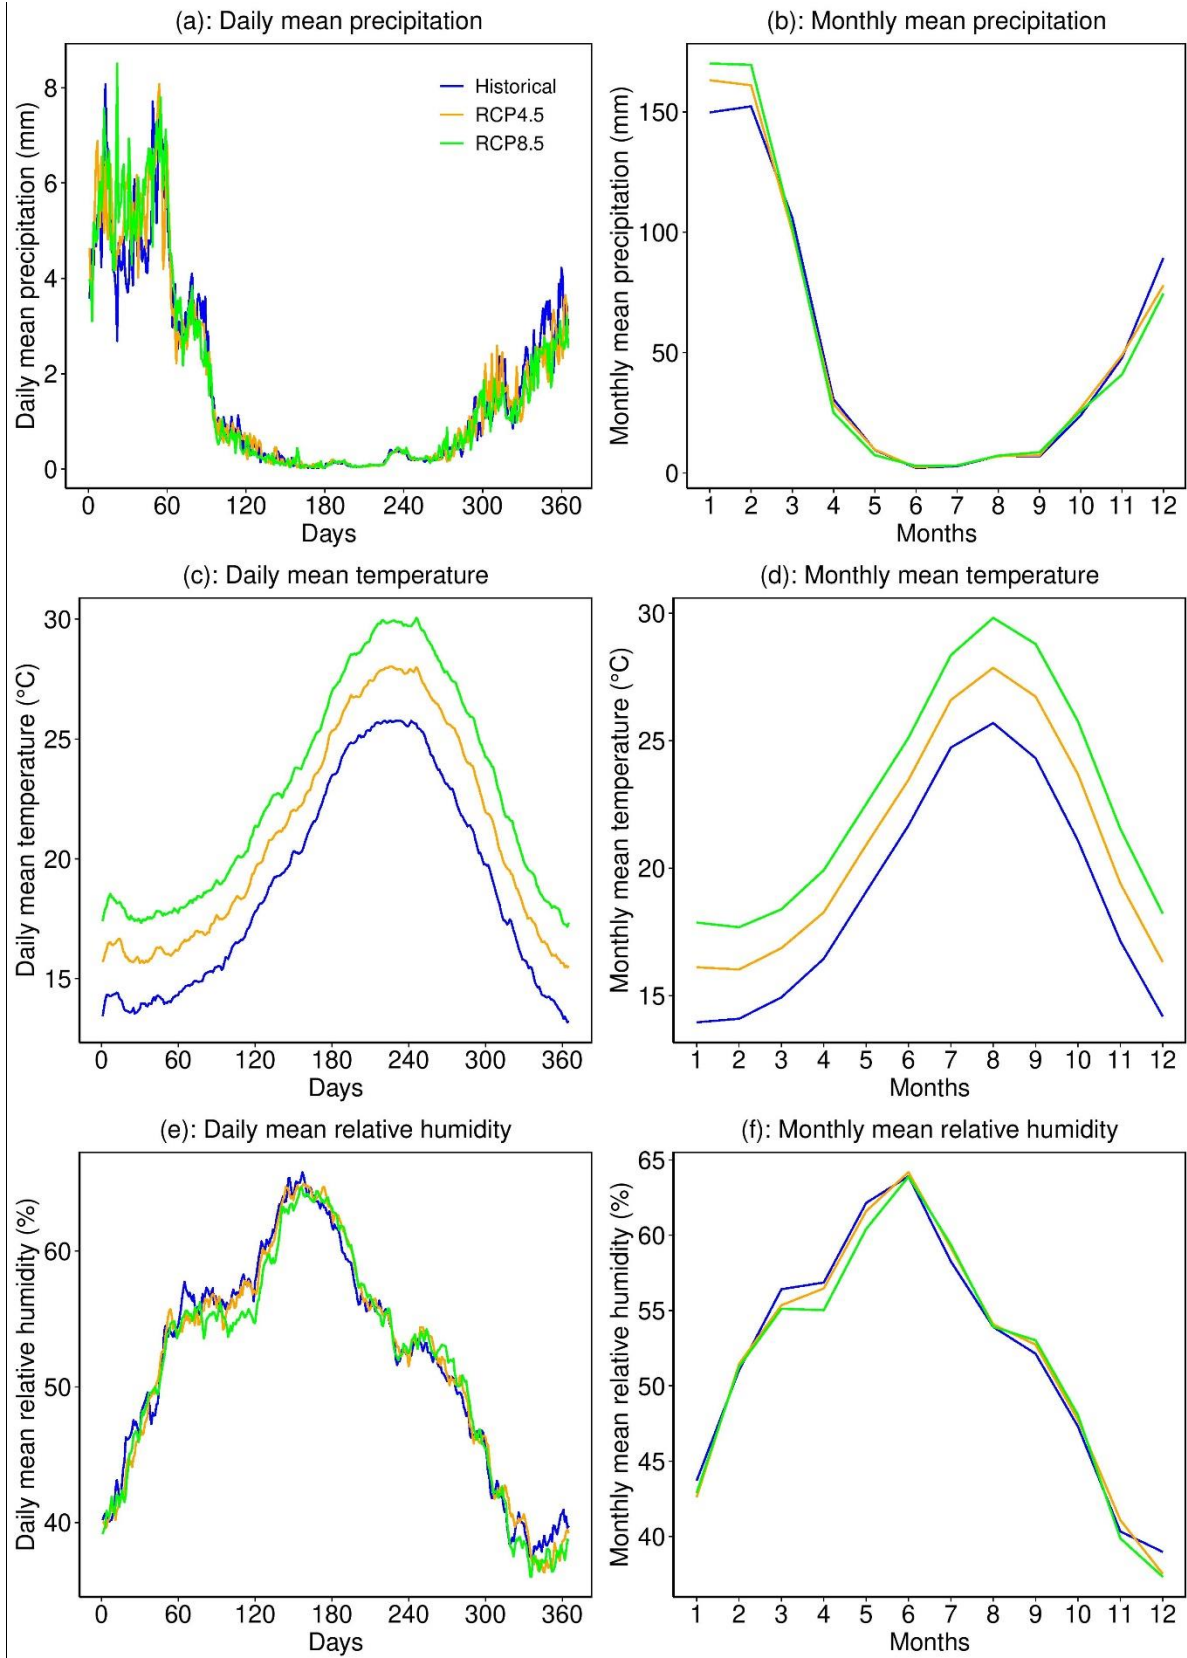



**Fig.S2** Daily and monthly mean precipitation, temperature, relative humidity changes from historical data and future data under RCP 4.5 and 8.5 during 2075-2080-2099.

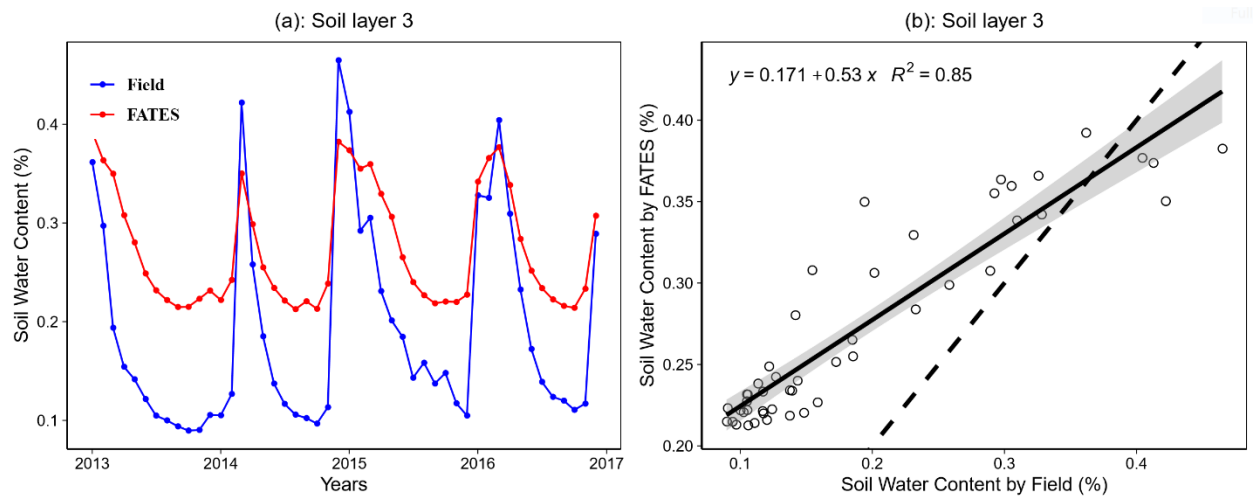

**Fig.S3** Simulated and observed monthly soil water content in soil layer 3 (5-cm depth) and related  $R^2$  value of their comparison.

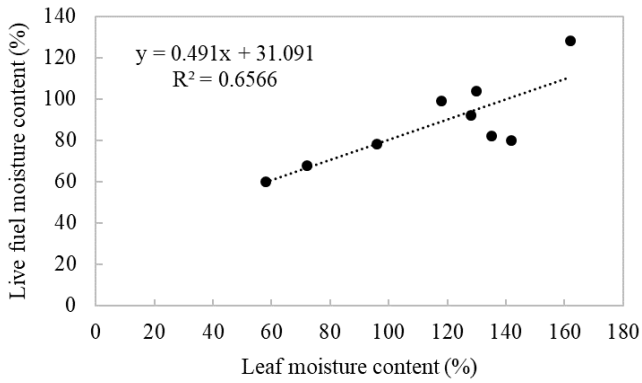

**Fig.S4** Empirical equation derived from shrub live fuel moisture content and leaf moisture content data including the three regenerative strategies [seeder (S), resprouter (R) and seeder–resprouter (SR)], in summer, autumn and winter from Figures 4 and 5 in Saura-Mas and Lloret’s study (2007).

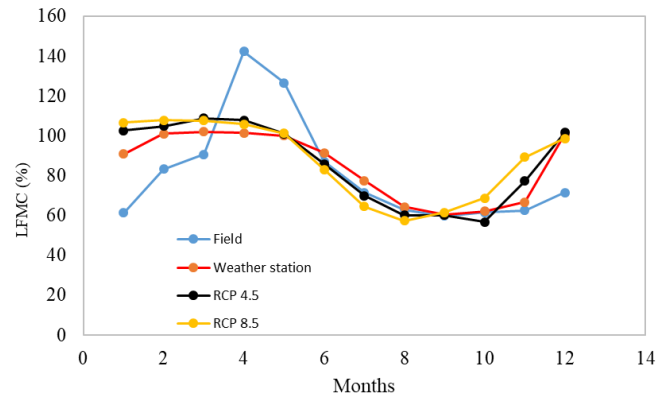

**Fig.S5** Observed monthly LFMC ([https://gacc.nifc.gov/oscc/predictive/fuels\\_fire-danger/myfiles/Fuels\\_Discussion1.pdf](https://gacc.nifc.gov/oscc/predictive/fuels_fire-danger/myfiles/Fuels_Discussion1.pdf)) and simulated monthly LFMC in 2018 using weather station climate data and MACA climate data under RCP 4.5 and 8.5 for Santa Monica Mountains Chamise (*Adenostoma fasciculatum*).
